# Supplementary material for: Theoretical prediction of valley spin splitting in two-dimensional Janus MSiGeZ4 (M = Cr and W; Z = N, P, and As)
Source: Royal Society of Chemistry journal article supplement (doi:10.1039/d3cp00849e), 2023-01-01
Supplement: d3cp00849e2.pdf [file d3cp00849e2.pdf]

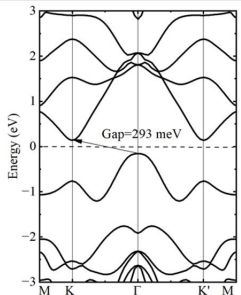

(a) CrSiGeN<sub>4</sub>

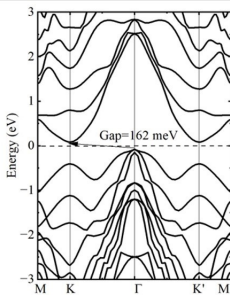

(b) CrSiGeP<sub>4</sub>

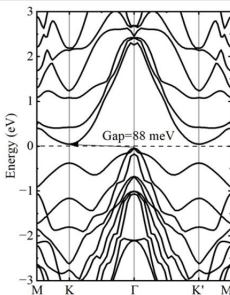

(c) CrSiGeAs<sub>4</sub>

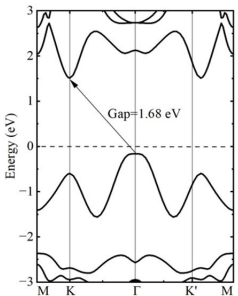

(d) WSiGeN<sub>4</sub>

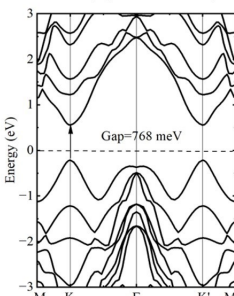

(e) WSiGeP<sub>4</sub>

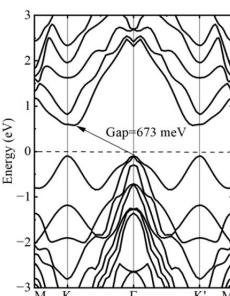

(f) WSiGeAs<sub>4</sub>
