# Supplementary material for: Theoretical prediction of valley spin splitting in two-dimensional Janus MSiGeZ4 (M = Cr and W; Z = N, P, and As)
Source: Royal Society of Chemistry journal article supplement (doi:10.1039/d3cp00849e), 2023-01-01
Supplement: d3cp00849e8.pdf [file d3cp00849e8.pdf]

## Supplementary Materials

Theoretical prediction of spin-orbit coupling and valley spin splitting in two-dimensional Janus MSiGeZ<sub>4</sub> (M=Cr, W; Z=N, P, As)

Ying Li<sup>†</sup>, Mengxian Lan<sup>†</sup>, Suen Wang, Tian Huang, Yu Chen, Hong Wu, Feng Li\*, Yong Pu\*

New Energy Technology Engineering Laboratory of Jiangsu Province & School of Science, Nanjing University of Posts and Telecommunications (NJUPT), Nanjing 210046, China.

### Corresponding Author

lifeng@njupt.edu.cn; [puyong@njupt.edu.cn](mailto:puyong@njupt.edu.cn)

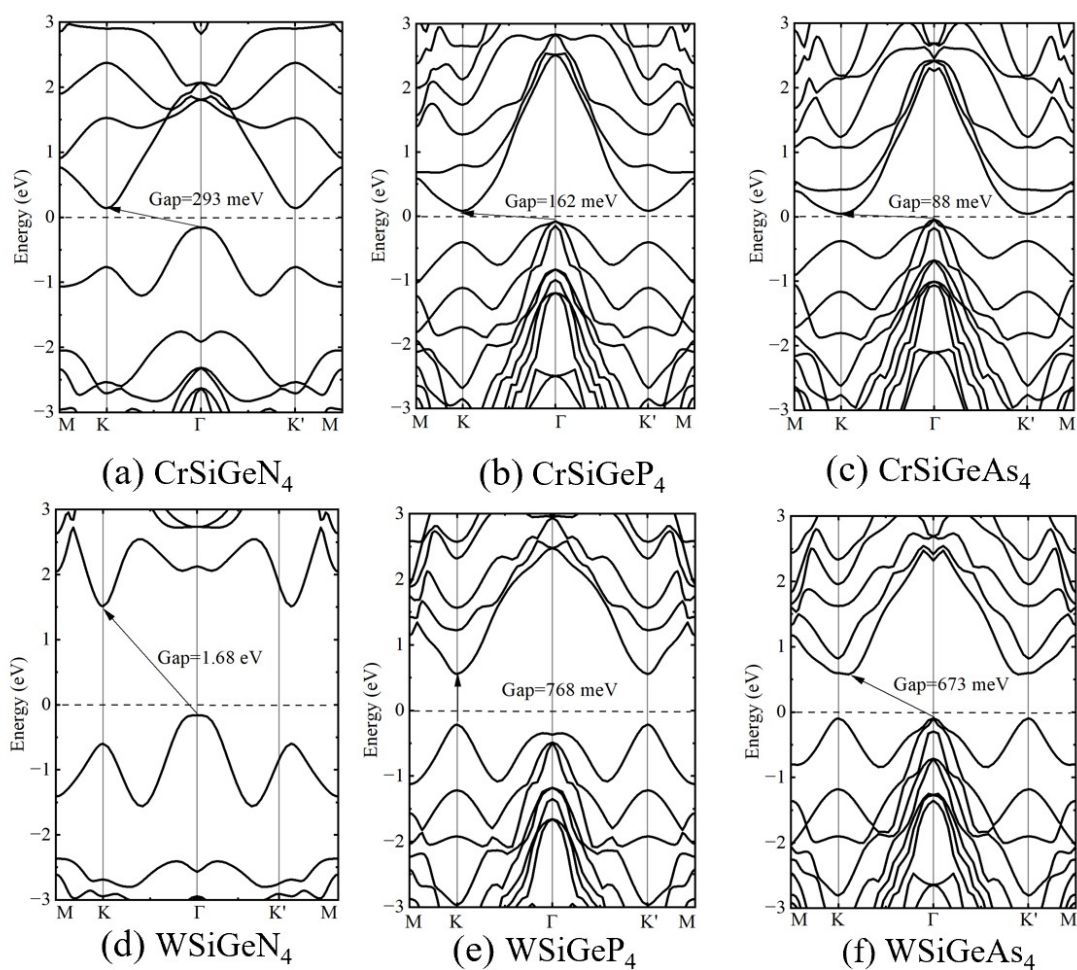

Fig. S1: (a-f) 2D Janus MSiGeZ<sub>4</sub> (M=Cr, W; Z=N, P, As) energy band diagrams without considering SOC.

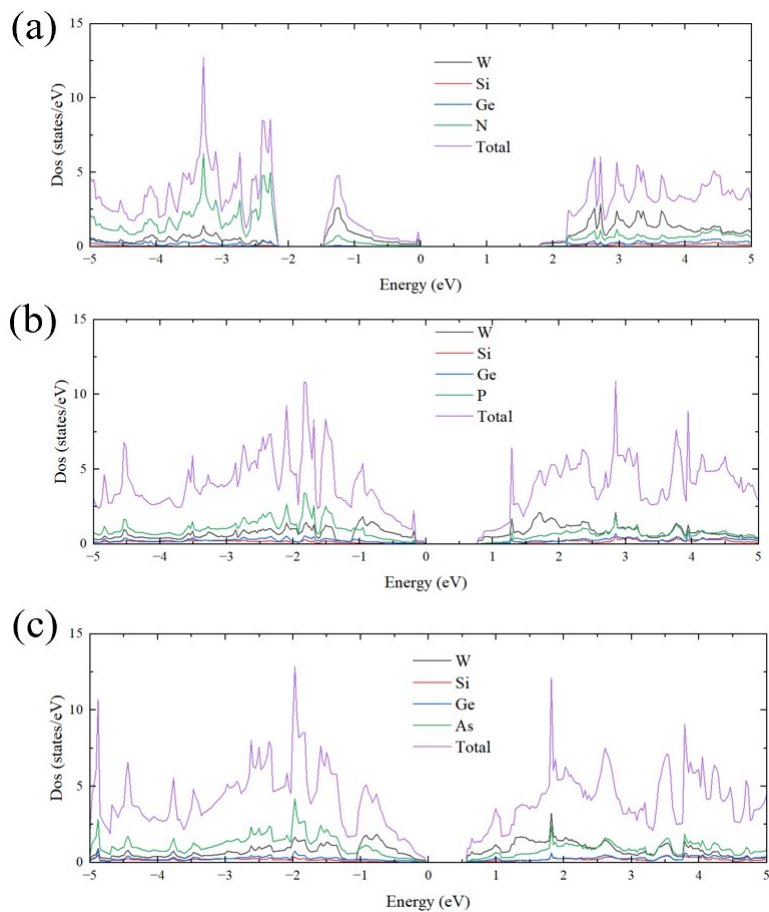

Fig. S2: Plot of total and local density of states for 2D WSiGeZ<sub>4</sub> (Z=N, P, As).

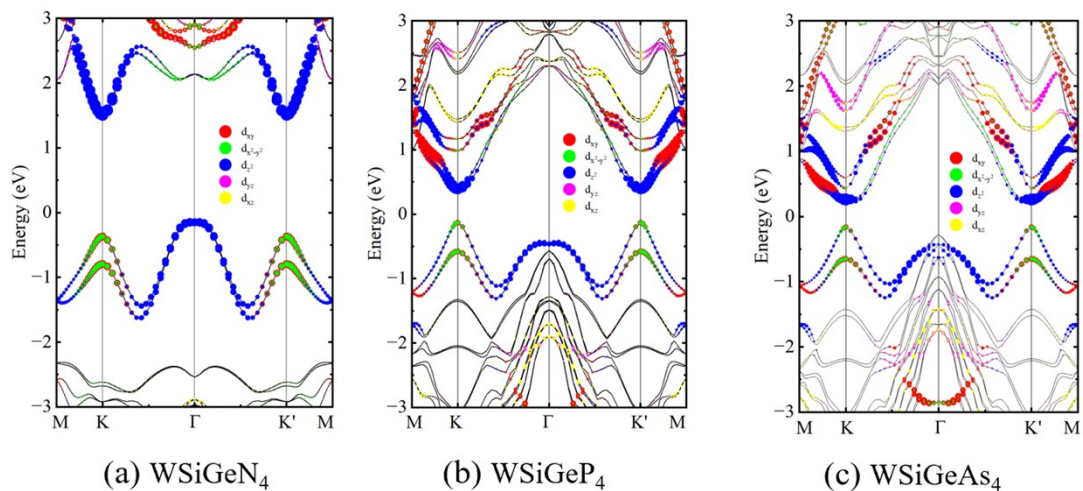

Fig. S3: Atomic orbital projection of 2D WSiGeZ<sub>4</sub> (Z=N, P, As).

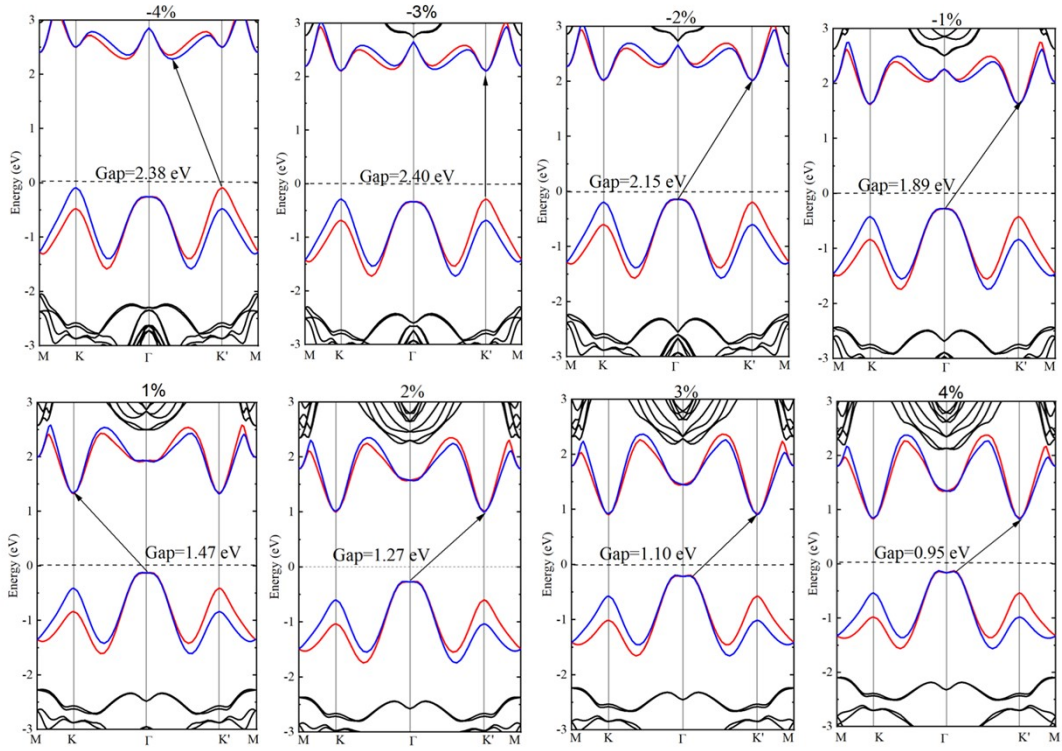

Fig. S4: Energy band diagram of biaxial strain on 2D WSiGeN<sub>4</sub> modulation.

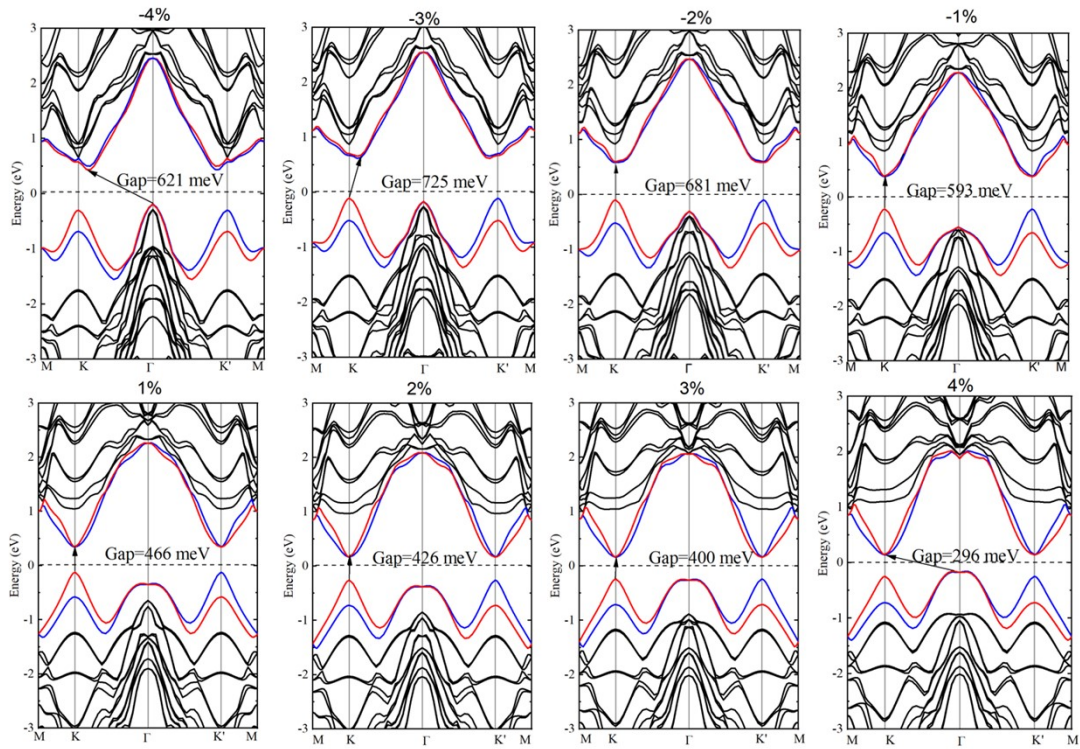

Fig. S5: Energy band diagram of biaxial strain on 2D WSiGeP<sub>4</sub> modulation.



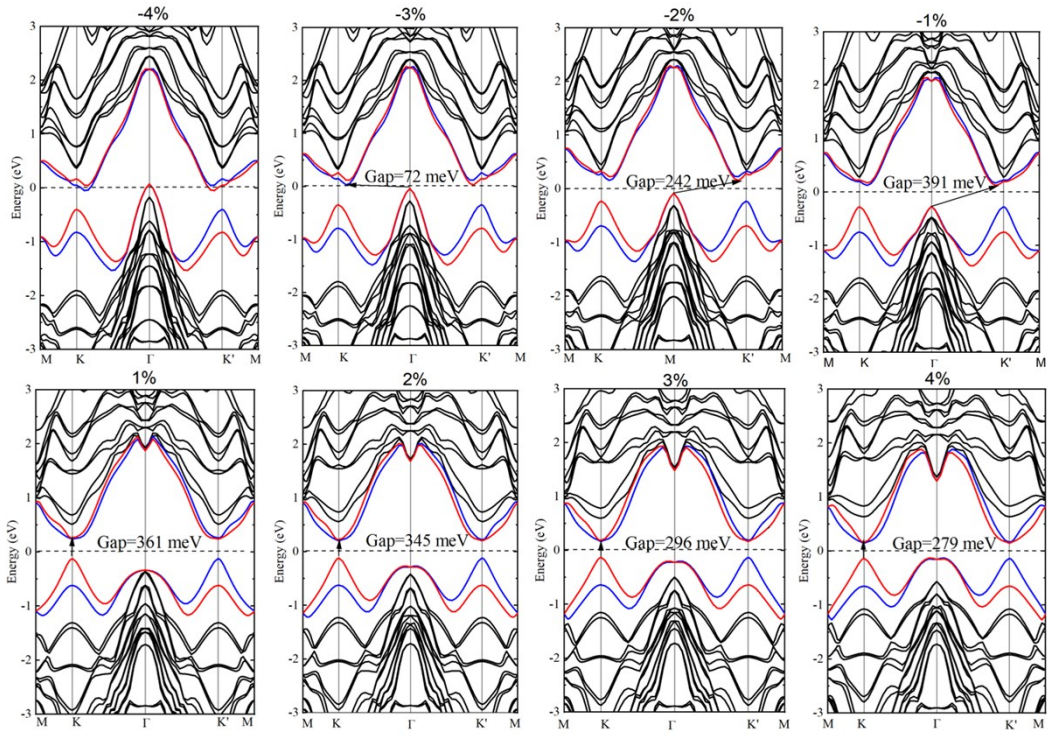

Fig. S6: Energy band diagram of biaxial strain on 2D WSiGeAs<sub>4</sub> modulation.
