# Supplementary figures and images for: Theoretical prediction of valley spin splitting in two-dimensional Janus MSiGeZ4 (M = Cr and W; Z = N, P, and As)
Source: Royal Society of Chemistry journal article supplement (doi:10.1039/d3cp00849e), 2023-01-01

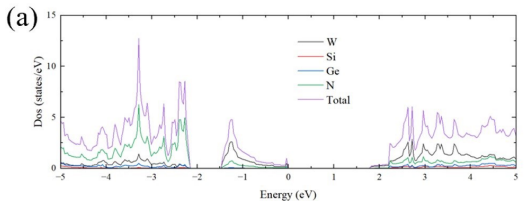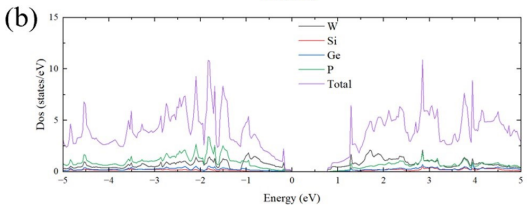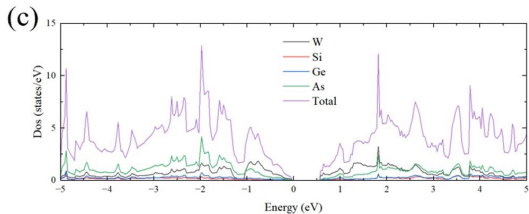

Supplement: d3cp00849e3.pdf [file d3cp00849e3.pdf]

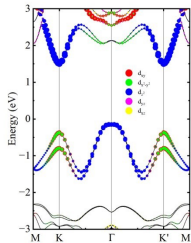

(a) WSiGeN<sub>4</sub>

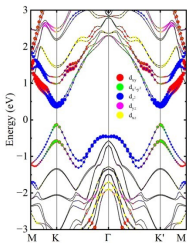

(b) WSiGeP<sub>4</sub>

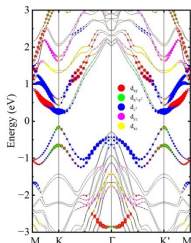

(c) WSiGeAs<sub>4</sub>

Supplement: d3cp00849e4.pdf [file d3cp00849e4.pdf]

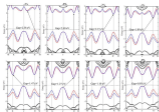

Supplement: d3cp00849e5.pdf [file d3cp00849e5.pdf]

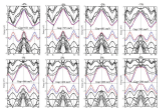

Supplement: d3cp00849e6.pdf [file d3cp00849e6.pdf]
